# Supplementary material
Source: PubMed Central journal article supplement (PMC6193384)
Supplement: zam021188819s1.pdf [file zam021188819s1.pdf]

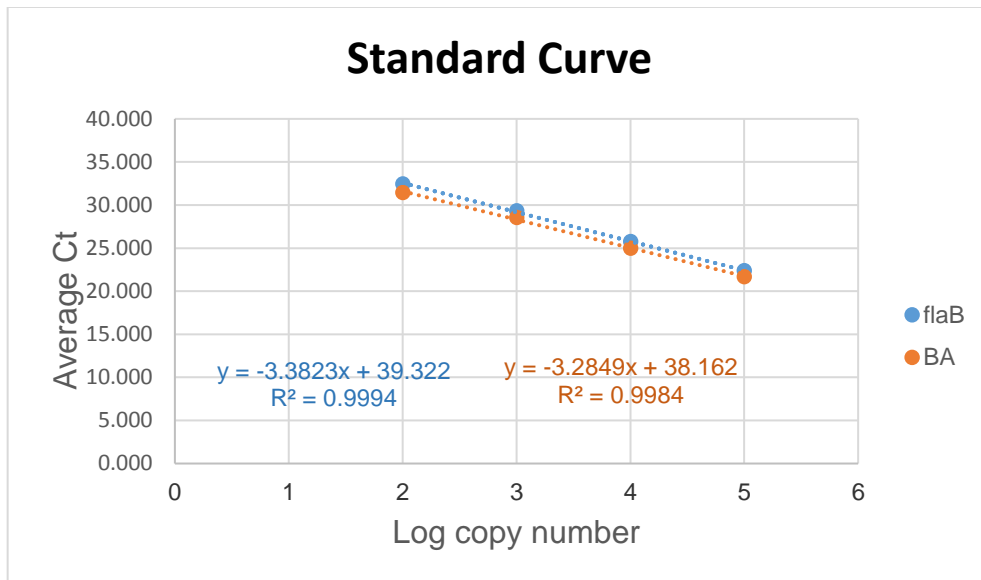

FIG. S1. **Amplification plots of standard curves of duplex qPCR.** *flaB* and  *$\beta$  actin* were cloned into PCR 2.1 vector individually generating, PCR2.1::*flaB* and PCR2.1:: *$\beta$  actin*. Standard curves of serial dilutions from  $1 \times 10^5$  to  $1 \times 10^1$  copies of *flaB* and  *$\beta$  actin* plasmids were generated from a duplex qPCR reaction. The x-axis indicates log copy numbers of *flaB* and  *$\beta$  actin* plasmids and the y-axis indicates the average Ct values.
